# Supplementary material
Source: PubMed Central journal article supplement (PMC6337824)

# **Azacitidine with or without eltrombopag for first-line treatment of intermediate- or high-risk MDS with thrombocytopenia**

## **Supplemental information**

### **SUPPORT study principal investigators**

Marcelo Iastrbner (Argentina), Dorotea Fantl (Argentina), Daniel Bar (Argentina), Michael Dickinson (Australia), Jake Shortt (Australia), Sundreswran Ramanathan (Australia), Devendra Hiwase (Australia), Richard Greil (Austria), Johannes Andel (Austria), Michael Pfeilstöcker (Austria), Agnes Triffet (Belgium), Dominik Selleslag (Belgium), Michel Delforge (Belgium), Greet Bries (Belgium), Phillip Scheinberg (Brazil), Sergio Araujo (Brazil), Jaisson Andre Bortolini (Brazil), Tania Madeira (Brazil), Cristiane Weber (Brazil), Laura Garcia (Brazil), Vincent Laroche (Canada), Harold Olney (Canada), Andre Schuh (Canada), Olga Cerna (Czech Republic), Jiri Mayer (Czech Republic), Anna Jonasova (Czech Republic), Roman Hajek (Czech Republic), Jaroslav Cermak (Czech Republic), Mette Holm (Denmark), Françoise Isnard (France), Pierre Fenaux (France), Stéphane Cheze (France), Kamel Laribi (France), Mathilde Hunault-Berger (France), Pascale Cony-Makhoul (France), Claudio Denzlinger (Germany), Ulrich Germing (Germany), Aristoteles Giagounidis (Germany), Detlef Haase (Germany), Uwe Platzbecker (Germany), Curd-David Badrakhani (Germany), Efthymia Vlachaki (Greece), Georgia Kaiafa (Greece), Argiris Symeonidis (Greece), Panagiotis Panagiotidis (Greece), Sze-Fai Yip (Hong Kong), Sun Yu Herman Liu (Hong Kong), Yok Lam Kwong (Hong Kong), Raymond Wong (Hong Kong), Árpád Illés (Hungary), Zita Borbényi (Hungary), Amjad Hayat (Hungary), Helen Enright (Ireland), Eibhlin Conneally (Ireland), Yossef Kalish (Israel), Moshe Mittelman (Israel), Yishay Ofran (Israel), Pia Raanani (Israel), Valeria Santini (Italy), Gianluca Gaidano (Italy), Dario Ferrero (Italy), Eva Fabiola Ramirez-Romero (Mexico), Ingunn Dybedal (Norway), Astrid Kittang (Norway), Victor Ulloa (Peru), Maria Soroka-Wojtaszko (Poland), Dorota Krochmalczyk (Poland), Homenda Wojciech (Poland), Dariusz Woszczyk (Poland), Jawiga Holojda (Poland), Edgardo

Santiago-Guzman (Puerto Rico), JeHwan Lee (Republic of Korea), Jun Ho Jang (Republic of Korea), Yoo-Jin Kim (Republic of Korea), Dzhelil Osmanov (Russian Federation), Kudrat Abdulkadyrov (Russian Federation), Andrey Zaritskiy (Russian Federation), Elena Borisenkova (Russian Federation), Tatiana Chagorova (Russian Federation), Elena Parovichnikova (Russian Federation), Natalya Arkhipova (Russian Federation), Patricia Font López (Spain), María Calbacho Robles (Spain), Raquel de Paz Arias (Spain), Aránzazu Alonso Alonso (Spain), David Valcarcel (Spain), Jordi Esteve Reyner (Spain), María del Mar Tormo Díaz (Spain), Regina García Delgado (Spain), María Díez Campelo (Spain), Emilio Ojeda Gutiérrez (Spain), Teresa Bernal del Castillo (Spain), Joan Bargay Lleonart (Spain), Bernardo Javier González González (Spain), Guillermo Sanz Santillana (Spain), Rosa Coll Jordá (Spain), Honar Cherif (Sweden), Per-Anders Broliden (Sweden), Hege Gravdahl Garelius (Sweden), Stefan Balabanov (Sweden), Nicolas Bonadies (Switzerland), Nicolas Bonadies (Switzerland), Tzeon-Jye Chiou (Taiwan), Cheng-Shyong Chang (Taiwan), Ming Chung Wang (Taiwan), Noppadol Siritanaratkul (Thailand), Pantep Angchaisuksiri (Thailand), Tawatchai Suwanban (Thailand), Lalita Norasetthada (Thailand), Osman Ilhan (Turkey), Guray Saydam (Turkey), Inci Alacacioglu (Turkey), Mehmet Turgut (Turkey), Adam Boruchov (USA), Robert Richard (USA), Amit Verma (USA), Meagan Jacoby (USA), Martha Arellano (USA).

**Supplemental Table S1. Summary of PFS from investigator assessment and central review (ITT)**

|                                | <b>Eltrombopag<br/>(N=179)</b> | <b>Placebo<br/>(N=177)</b> |
|--------------------------------|--------------------------------|----------------------------|
| <b>Investigator assessment</b> |                                |                            |
| Events, n (%)                  | 72 (40)                        | 66 (37)                    |
| Death                          | 34 (19)                        | 36 (20)                    |
| Disease progression            | 38 (21)                        | 30 (17)                    |
| Censored                       | 107 (60)                       | 111 (63)                   |
| Kaplan–Meier estimates (days)* |                                |                            |
| First quartile (95% CI)        | 104 (61, 156)                  | 174 (133, 238)             |
| Median (95% CI)                | 345 (204, 364)                 | 423 (345, 500)             |
| Third quartile (95% CI)        | NA                             | 549 (500, NA)              |
| HR (95% CI)†                   | 1.47 (1.05, 2.07)              |                            |
| Nominal <i>P</i> value         | 0.060                          |                            |
| <b>Central review</b>          |                                |                            |
| Events, n (%)                  | 76 (42)                        | 67 (38)                    |
| Death                          | 44 (25)                        | 41 (23)                    |
| Disease progression            | 32 (18)                        | 26 (15)                    |
| Censored                       | 103 (58)                       | 110 (62)                   |
| Kaplan–Meier estimates (days)* |                                |                            |
| First quarter (95% CI)         | 129 (66, 156)                  | 158 (114, 182)             |
| Median (95% CI)                | 330 (194, 351)                 | 394 (298, 479)             |
| Third quartile (95% CI)        | NA                             | NA                         |
| HR (95% CI)†                   | 1.38 (0.99, 1.92)              |                            |
| Nominal <i>P</i> value         | 0.141                          |                            |

\*CI estimated using the Brookmeyer–Crowley method; †HRs estimated using the Pike estimator. CI, confidence interval; HR, hazard ratio; ITT, intent-to-treat; NA, not assessable; PFS, progression-free survival.

**Supplemental Table S2. Summary of time to overall response and response duration**

|                                                               | <b>Eltrombopag<br/>(N=179)</b> | <b>Placebo<br/>(N=177)</b> | <b>Odds ratio<br/>(95% CI)</b> | <b>Nominal<br/>P value</b> |
|---------------------------------------------------------------|--------------------------------|----------------------------|--------------------------------|----------------------------|
| <b>Investigator assessment</b>                                |                                |                            |                                |                            |
| Overall response, n (%)                                       | 36 (20)                        | 62 (35)                    | 0.51<br>(0.30, 0.86)           | 0.005                      |
| Censored                                                      | 143 (80)                       | 115 (65)                   |                                |                            |
| Complete response                                             | 15 (8)                         | 26 (15)                    |                                |                            |
| Kaplan–Meier estimates<br>for time to response<br>(days)*     |                                |                            |                                |                            |
| First quartile (95% CI)                                       | 167 (156, 184)                 | 159 (155, 165)             |                                |                            |
| Median (95% CI)                                               | NA (NA, 416)                   | 315 (171, 475)             |                                |                            |
| Third quartile (95% CI)                                       | NA                             | NA (NA, 475)               |                                |                            |
| Kaplan–Meier estimates<br>for duration of response<br>(days)* |                                |                            |                                |                            |
| First quartile (95% CI)                                       | NA (NA, 169)                   | 151 (119, 190)             |                                |                            |
| Median (95% CI)                                               | NA                             | 246 (189, 254)             |                                |                            |
| Third quartile (95% CI)                                       | NA                             | NA (NA, 254)               |                                |                            |
| <b>Central review</b>                                         |                                |                            |                                |                            |
| Overall response, n (%)                                       | 15 (8)                         | 19 (11)                    | 0.89<br>(0.41, 1.97)           | 0.683                      |
| Censored                                                      | 164 (92)                       | 158 (89)                   |                                |                            |
| Complete response                                             | 11 (6)                         | 7 (4)                      |                                |                            |
| Kaplan–Meier estimates<br>for time to response<br>(days)*     |                                |                            |                                |                            |
| First quartile (95% CI)                                       | NA (NA, 328)                   | NA (NA, 330)               |                                |                            |
| Median (95% CI)                                               | NA                             | NA                         |                                |                            |
| Third quartile (95% CI)                                       | NA                             | NA                         |                                |                            |
| Kaplan–Meier estimates<br>for duration of response<br>(days)* |                                |                            |                                |                            |
| First quartile (95% CI)                                       | NA                             | 232 (107, 246)             |                                |                            |
| Median (95% CI)                                               | NA                             | NA (NA, 246)               |                                |                            |
| Third quartile (95% CI)                                       | NA                             | NA (NA, 246)               |                                |                            |

\*CI estimated using the Brookmeyer–Crowley method. Overall response = complete response + marrow CR + partial response, according to IWG criteria. CI, confidence interval; IWG, International Working Group; NA, not assessable.

**Supplemental Table S3. Summary of hematologic improvements**

|                                          | <b>Eltrombopag<br/>(N=179)</b> | <b>Placebo<br/>(N=177)</b> | <b>Odds ratio (95%)<br/>for platelets*</b> | <b>Nominal<br/>P value*</b> |
|------------------------------------------|--------------------------------|----------------------------|--------------------------------------------|-----------------------------|
| Any improvement, n (%)                   | 58 (32)                        | 59 (33)                    |                                            |                             |
| Platelets                                | 56 (31)                        | 57 (32)                    | 0.96 (0.60, 1.54)                          | 0.922                       |
| Neutrophils                              | 12 (7)                         | 13 (7)                     | 0.93 (0.40, 2.13)                          | 0.860                       |
| Hemoglobin                               | 1 (1)                          | 1 (1)                      | 1.28 (0.11, 14.93)                         | 0.858                       |
| Platelets and neutrophils                | 10 (6)                         | 11 (6)                     |                                            |                             |
| Platelets and hemoglobin                 | 1 (1)                          | 1 (1)                      |                                            |                             |
| Neutrophils and hemoglobin               | 1 (1)                          | 1 (1)                      |                                            |                             |
| Platelets, neutrophils and<br>hemoglobin | 1 (1)                          | 1 (1)                      |                                            |                             |

\*CMH test stratified by randomization stratification factors. Logit estimator for odds ratio.

CMH, Cochran–Mantel–Haenszel.

**Supplemental Table S4. List of patients who were evaluated as having progression to AML**

| Patient # | Treatment received<br>eltrombopag/<br>placebo | AML progression<br>central/local | Time since<br>randomization<br>to AML<br>progression | Male/<br>female | Race                           | Baseline values |                                    |                       |               |
|-----------|-----------------------------------------------|----------------------------------|------------------------------------------------------|-----------------|--------------------------------|-----------------|------------------------------------|-----------------------|---------------|
|           |                                               |                                  |                                                      |                 |                                | Karyotype       | BM blasts,<br>local/<br>central, % | IPSS<br>risk<br>score | Age,<br>years |
| 1         | Placebo                                       | Local                            | 226                                                  | Female          | White                          | Normal          | 1.1/4.0                            | Int-1                 | 79            |
| 2         | Placebo                                       | Central                          | 153                                                  | Male            | White                          | Int             | 11.0/10.0                          | Int-2                 | 67            |
| 3         | Placebo                                       | Local                            | 86                                                   | Male            | Asian                          | Normal          | 2.0/12.0                           | Int-1                 | 52            |
| 4         | Placebo                                       | Central                          | 387                                                  | Male            | Asian                          | Poor            | 12.5/2.0                           | High                  | 72            |
| 5         | Placebo                                       | Central and local                | 85 (central),<br>141 (local)                         | Male            | Asian                          | Normal          | 18.6/14.0                          | Int-2                 | 72            |
| 6         | Placebo                                       | Central and local                | 182                                                  | Male            | Asian                          | Normal          | 11.4/10.0                          | Int-2                 | 78            |
| 7         | Placebo                                       | Local                            | 256                                                  | Male            | White                          | Poor            | 15.0/12.5                          | High                  | 61            |
| 8         | Placebo                                       | Central and local                | 262                                                  | Female          | White                          | Poor            | 10.0/13.0                          | Int-2                 | 76            |
| 9         | Placebo                                       | Central and local                | 106 (central),<br>359 (local)                        | Male            | White                          | Int             | 8.0/7.0                            | Int-1                 | 47            |
| 10        | Placebo                                       | Local                            | 389                                                  | Female          | Asian                          | Poor            | 19.0/NR                            | High                  | 68            |
| 11        | Placebo                                       | Local                            | 114                                                  | Male            | White                          | Normal          | 6.0/32.0                           | Int-1                 | 59            |
| 12        | Placebo                                       | Local                            | 279                                                  | Male            | White                          | Int             | 3.0/10.0                           | Int-1                 | 63            |
| 13        | Placebo                                       | Central                          | 121                                                  | Female          | White                          | Normal          | 17.0/15.0                          | Int-2                 | 61            |
| 14        | Placebo                                       | Central                          | 99                                                   | Female          | White                          | Int             | 9.0/8.0                            | Int-2                 | 73            |
| 15        | Placebo                                       | Local                            | 162                                                  | Male            | White                          | Normal          | 14.0/53.0                          | Int-2                 | 73            |
| 16        | Placebo                                       | Local                            | 263                                                  | Female          | White                          | Poor            | 15.0/NR                            | High                  | 66            |
| 17        | Placebo                                       | Local                            | 143                                                  | Male            | White                          | Poor            | 10.6/15.0                          | Int-2                 | 62            |
| 18        | Placebo                                       | Local                            | 162                                                  | Male            | White                          | Poor            | 10.0/14.0                          | Int-2                 | 69            |
| 19        | Placebo                                       | Central and local                | 174                                                  | Female          | White                          | Int             | 8.6/16.0                           | Int-2                 | 72            |
| 20        | Placebo                                       | Central and local                | 33                                                   | Male            | White                          | Poor            | 13.4/43.0                          | High                  | 67            |
| 21        | Eltrombopag                                   | Local                            | 183                                                  | Female          | White                          | Poor            | 10.8/2.5                           | High                  | 58            |
| 22        | Eltrombopag                                   | Central and local                | 101                                                  | Male            | Native<br>Hawaiian or<br>other | Normal          | 0.6/2.5                            | Int-1                 | 79            |

| Patient # | Treatment received<br>eltrombopag/<br>placebo | AML progression<br>central/local | Time since<br>randomization<br>to AML<br>progression | Male/<br>female | Race       | Baseline values |                                    |                       |               |
|-----------|-----------------------------------------------|----------------------------------|------------------------------------------------------|-----------------|------------|-----------------|------------------------------------|-----------------------|---------------|
|           |                                               |                                  |                                                      |                 |            | Karyotype       | BM blasts,<br>local/<br>central, % | IPSS<br>risk<br>score | Age,<br>years |
| 23        | Eltrombopag                                   | Local                            | 307                                                  | Male            | White      | Normal          | 5.0/NR                             | Int-1                 | 72            |
| 24        | Eltrombopag                                   | Local and central                | 260                                                  | Female          | White      | Normal          | 0.2/4.0                            | Int-1                 | 84            |
| 25        | Eltrombopag                                   | Local and central                | 38 (local),<br>39 (central)                          | Female          | Asian      | Poor            | 10.0/12.5                          | Int-2                 | 59            |
| 26        | Eltrombopag                                   | Local and central                | 197 (local),<br>225 (central)                        | Male            | White      | Normal          | 14.4/25.0                          | Int-2                 | 62            |
| 27        | Eltrombopag                                   | Local and central                | 56                                                   | Male            | White      | NE              | 18.6/12.0                          | High                  | 57            |
| 28        | Eltrombopag                                   | Local                            | 36                                                   | Male            | White      | Normal          | 5.0/4.0                            | Int-1                 | 76            |
| 29        | Eltrombopag                                   | Central                          | 167                                                  | Male            | White      | Normal          | 2.0/15.0                           | Int-1                 | 66            |
| 30        | Eltrombopag                                   | Local and central                | 167 (central),<br>197 (local)                        | Female          | White      | Poor            | 12.0/6.0                           | High                  | 50            |
| 31        | Eltrombopag                                   | Local                            | 81                                                   | Male            | White      | Normal          | 7.3/5.0                            | Int-1                 | 79            |
| 32        | Eltrombopag                                   | Local and central                | 160 (central),<br>245 (local)                        | Male            | White      | Poor            | 3.0/25.0                           | Int-1                 | 76            |
| 33        | Eltrombopag                                   | Local and central                | 190 (central),<br>303 (local)                        | Male            | East Asian | Int             | 4.6/24.0                           | Int-1                 | 34            |
| 34        | Eltrombopag                                   | Local                            | 39                                                   | Female          | White      | Poor            | 8.0/8.0                            | Int-2                 | 52            |
| 35        | Eltrombopag                                   | Central                          | 113                                                  | Male            | Asian      | Int             | 2.8/15.0                           | High                  | 59            |
| 36        | Eltrombopag                                   | Central                          | 139                                                  | Male            | Asian      | Poor            | 17.2/13.0                          | High                  | 81            |
| 37        | Eltrombopag                                   | Local and central                | 60                                                   | Male            | White      | Normal          | 3.5/11.0                           | Int-1                 | 85            |
| 38        | Eltrombopag                                   | Central                          | 92                                                   | Male            | White      | Int             | 5.2/4.0                            | Int-2                 | 69            |
| 39        | Eltrombopag                                   | Local and central                | 44                                                   | Male            | White      | Normal          | 17.8/4.0                           | Int-2                 | 71            |
| 40        | Eltrombopag                                   | Local                            | 23                                                   | Female          | White      | Normal          | 11.2/NR                            | Int-2                 | 49            |
| 41        | Eltrombopag                                   | Local and central                | 20                                                   | Male            | White      | Int             | 14.0/11.0                          | Int-2                 | 66            |
| 42        | Eltrombopag                                   | Local and central                | 163 (central),<br>236 (local)                        | Male            | White      | Poor            | 12.0/27.0                          | High                  | 78            |

| Patient # | Treatment received<br>eltrombopag/<br>placebo | AML progression<br>central/local | Time since<br>randomization<br>to AML<br>progression | Male/<br>female | Race  | Baseline values |                                    |                       | Age,<br>years |
|-----------|-----------------------------------------------|----------------------------------|------------------------------------------------------|-----------------|-------|-----------------|------------------------------------|-----------------------|---------------|
|           |                                               |                                  |                                                      |                 |       | Karyotype       | BM blasts,<br>local/<br>central, % | IPSS<br>risk<br>score |               |
| 43        | Eltrombopag                                   | Local                            | 30                                                   | Male            | White | Poor            | 4.0/12.5                           | Int-2                 | 66            |
| 44        | Eltrombopag                                   | Local                            | 39                                                   | Male            | White | Normal          | 12.0/9.0                           | Int-2                 | 86            |
| 45        | Eltrombopag                                   | Local                            | 29                                                   | Male            | White | Poor            | 18.0/39.0                          | High                  | 64            |
| 46        | Eltrombopag                                   | Local and central                | 29 (central),<br>30 (local)                          | Female          | White | Int             | 10.3/NR                            | Int-2                 | 69            |
| 47        | Eltrombopag                                   | Local and central                | 33 (central),<br>112 (local)                         | Male            | White | Normal          | 1.4/18.0                           | Int-1                 | 77            |
| 48        | Eltrombopag                                   | Local                            | 31                                                   | Male            | White | Int             | 1.0/8.0                            | Int-1                 | 68            |
| 49        | Eltrombopag                                   | Local                            | 176                                                  | Female          | White | Normal          | 11.0/NR                            | Int-2                 | 59            |
| 50        | Eltrombopag                                   | Central                          | 1                                                    | Male            | White | Normal          | 3.8/16.0                           | Int-1                 | 65            |
| 51        | Eltrombopag                                   | Central                          | 183                                                  | Male            | White | Int             | 17.0/29.0                          | High                  | 87            |
| 52        | Eltrombopag                                   | Local and central                | 160                                                  | Female          | White | Int             | 2.0/7.0                            | Int-1                 | 72            |
| 53        | Eltrombopag                                   | Local                            | 26                                                   | Female          | White | Int             | 14.0/11.0                          | High                  | 79            |

Good = normal karyotype, Y alone, del(5q) alone, or del(20q) alone; Int, intermediate = other abnormalities; Poor = abnormalities involving chromosome 7 or those with a complex karyotype ( $\geq 3$  unassociated abnormalities). AML, acute myeloid leukemia; BM, bone marrow; Int-1, intermediate-1 (risk); Int-2, intermediate-2 (risk); IPSS, International Prognostic Scoring System; NE, not evaluable (absence of mitosis); NR, not reported.



**Supplemental Table S5. Proportion of patients who were evaluated as having progression to AML or with disease progression according to baseline blast count and IPSS risk category**

|                                                  | <b>Eltrombopag<br/>(N=179)</b> | <b>Placebo<br/>(N=177)</b> | <b>Odds ratio<br/>(95% CI)</b> | <b>Nominal<br/>P value</b> |
|--------------------------------------------------|--------------------------------|----------------------------|--------------------------------|----------------------------|
| <b>Progression to AML</b>                        |                                |                            |                                |                            |
| Baseline BM blast count, central assessment      |                                |                            |                                |                            |
| <5%, n (%)                                       | 4/36 (11)                      | 1/34 (3)                   | 1.95<br>(0.32, 11.76)          | 0.268                      |
| 5–20, n (%)                                      | 10/74 (14)                     | 8/80 (10)                  | 1.09<br>(0.36, 3.31)           | 0.817                      |
| >20%, n (%)                                      | 6/33 (18)                      | 1/23 (4)                   | 2.33<br>(0.45, 12.18)          | 0.145                      |
| Missing, n (%)                                   | 1/36 (3)                       | 0/40 (0)                   |                                |                            |
| Baseline BM blast count, investigator assessment |                                |                            |                                |                            |
| <5%, n (%)                                       | 9/56 (16)                      | 3/50 (6)                   |                                |                            |
| 5–20, n (%)                                      | 18/99 (18)                     | 12/116 (10)                |                                |                            |
| >20%, n (%)                                      | 0/12 (0)                       | 0/8 (0)                    |                                |                            |
| Missing, n (%)                                   | 0/12 (0)                       | 1/3 (33)                   |                                |                            |
| IPSS risk category, central assessment           |                                |                            |                                |                            |
| Int-1                                            | 9/64 (14)                      | 1/61 (2)                   |                                |                            |
| Int-2/high                                       | 12/115 (10)                    | 9/116 (8)                  |                                |                            |
| IPSS risk category, investigator assessment      |                                |                            |                                |                            |
| Int-1                                            | 11/64 (17)                     | 5/61 (8)                   |                                |                            |
| Int-2/high                                       | 16/115 (14)                    | 11/116 (9)                 |                                |                            |
| <b>Disease progression</b>                       |                                |                            |                                |                            |
| Baseline BM blast count, central assessment      |                                |                            |                                |                            |
| <5%, n (%)                                       | 10/36 (28)                     | 6/34 (18)                  | 0.89<br>(0.40, 1.97)           | 0.942                      |
| 5–20, n (%)                                      | 13/74 (18)                     | 17/80 (21)                 | 1.23<br>(0.75, 2.01)           | 0.678                      |
| >20%, n (%)                                      | 6/33 (18)                      | 2/23 (9)                   | 1.91<br>(0.86, 4.26)           | 0.195                      |
| Missing, n (%)                                   | 3/36 (8)                       | 1/40 (3)                   |                                |                            |
| Baseline BM blast count, investigator assessment |                                |                            |                                |                            |
| <5%, n (%)                                       | 13/56 (23)                     | 7/50 (14)                  |                                |                            |
| 5–20, n (%)                                      | 24/99 (24)                     | 20/116 (17)                |                                |                            |
| >20%, n (%)                                      | 1/12 (8)                       | 2/8 (25)                   |                                |                            |
| Missing, n (%)                                   | 0/12 (0)                       | 1/3 (33)                   |                                |                            |
| IPSS risk category, central assessment           |                                |                            |                                |                            |
| Int-1                                            | 17/64 (27)                     | 10/61 (16)                 |                                |                            |
| Int-2/high                                       | 15/115 (13)                    | 16/116 (14)                |                                |                            |
| IPSS risk category, investigator assessment      |                                |                            |                                |                            |
| Int-1                                            | 14/64 (22)                     | 7/61 (11)                  |                                |                            |
| Int-2/high                                       | 24/115 (21)                    | 23/116 (20)                |                                |                            |

AML, acute myeloid leukemia; BM, bone marrow; Int-1, intermediate-1 (risk); Int-2, intermediate-2 (risk); IPSS, International Prognostic Scoring System.

**Supplemental Figure S1. Number of azacitidine cycles completed (safety population)**

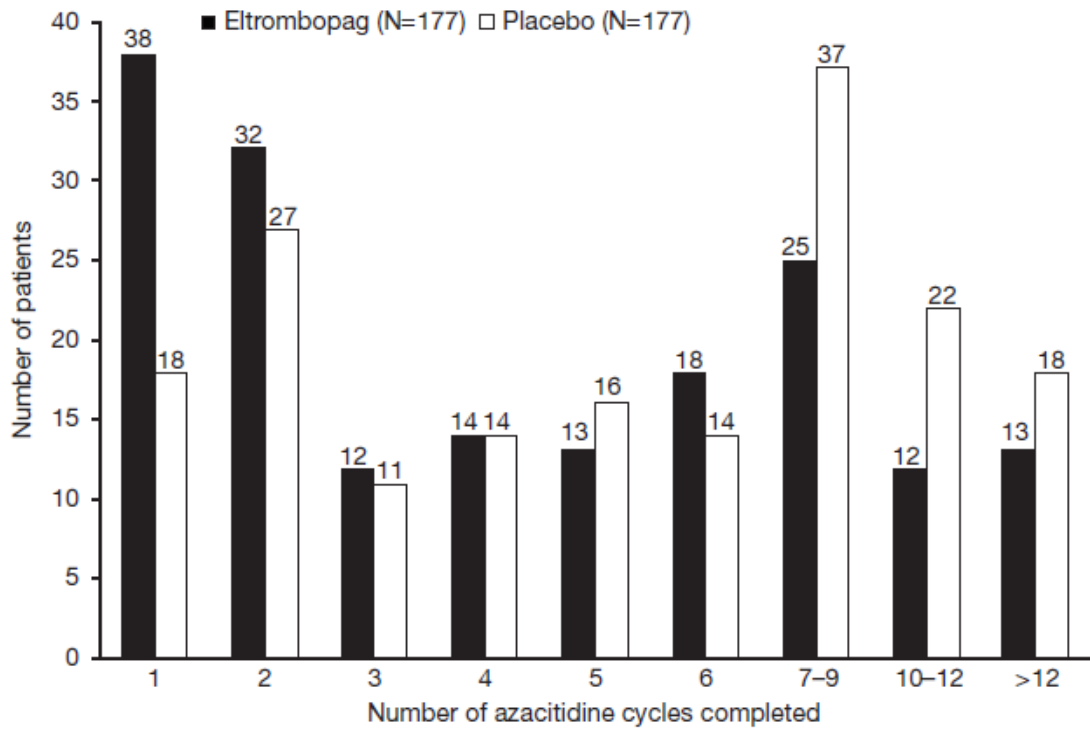

Supplement: blood855221-suppl1.pdf [file blood855221-suppl1.pdf]
